# Supplementary material
Source: ML conference proceedings conference paper supplement (https://proceedings.neurips.cc/paper_files/paper/2022/hash/dfbb3d1807b21dadee735eb75069ada4-Abstract.html)
Supplement: Supplementary file 1 [file dfbb3d1807b21dadee735eb75069ada4-Supplemental-Conference.zip]

Archive with 2 entries (2 files):
- hypro_appendix.pdf
- __MACOSX/._hypro_appendix.pdf
